# Supplementary material
Source: publisher site journal article supplement (https://www.dovepress.com/get_supplementary_file.php?f=239706.docx)
Supplement: Supplementary file 1 [file get_supplementary_file.php]

A total of 41 patients who were diagnosed with psychiatric or neuropsychiatric diagnosis or insomnia were excluded. The specific diagnosis is as follows:

Insomnie: n=11

Anxiety disorder: n=9

Depression disorder: n=11

Vesania: n=3

Schizophrenia: n=7
